# 1 How many replicates to accurately estimate fish 2 biodiversity using environmental DNA on coral reefs?

## 3 4 Authors:

5 **Salomé Stauffer**<sup>†</sup>: Landscape Ecology, Institute of Terrestrial Ecosystems,  
6 Department of Environmental Systems Science, ETH Zürich, Zürich, Switzerland

7 **Meret Jucker**<sup>†</sup>: Landscape Ecology, Institute of Terrestrial Ecosystems, Department  
8 of Environmental Systems Science, ETH Zürich, Zürich, Switzerland

9 **Thomas Keggin**: Landscape Ecology, Institute of Terrestrial Ecosystems,  
10 Department of Environmental Systems Science, ETH Zürich, Zürich, Switzerland &  
11 Unit of Land Change Science, Swiss Federal Research Institute WSL, Birmensdorf,  
12 Switzerland

13 **Virginie Marques**: MARBEC, Univ. Montpellier, CNRS, IFREMER, IRD, Montpellier,  
14 France & CEFÉ, Univ. Montpellier, CNRS, EPHE-PSL University, IRD, Univ. Paul  
15 Valéry Montpellier 3, Montpellier, France

16 **Marco Andreollo**: Institute for the Study of Anthropic Impacts and Sustainability in the  
17 Marine Environment, National Research Council, CNR-IAS, Rome, Italy

18 **Sandra Bessudo**: Fundación Malpelo y otros ecosistemas marinos, Bogotá  
19 Colombia

20 **Marie-Charlotte Cheutin**: MARBEC, Univ. Montpellier, CNRS, IFREMER, IRD,  
21 Montpellier, France

22 **Giomar Helena Borrero-Pérez**: Instituto de Investigaciones Marinas y Costeras-  
23 INVEMAR Museo de Historia Natural Marina de Colombia (MHNMC) Santa Marta  
24 Colombia

25 **Eilísh Richards**: Landscape Ecology, Institute of Terrestrial Ecosystems,  
26 Department of Environmental Systems Science, ETH Zürich, Zürich, Switzerland

27 **Tony Dejean**: SPYGEN, Le Bourget-du-Lac, France

28 **Régis Hocdé**: MARBEC, Univ. Montpellier, CNRS, IFREMER, IRD, Montpellier,  
29 France

30 **Jean-Baptiste Juhel**: MARBEC, Univ. Montpellier, CNRS, IFREMER, IRD,  
31 Montpellier, France

32 **Felipe Ladino**: Fundación Malpelo y otros ecosistemas marinos, Bogotá Colombia

33 **Tom B. Letessier**: Institute of Zoology, Zoological Society of London, London, UK &  
34 Marine Futures Lab, University of Western Australia, Crawley, WA, 6009, Australia

35 **Nicolas Loiseau**: MARBEC, Univ. Montpellier, CNRS, IFREMER, IRD, Montpellier,  
36 France

37 **Eva Maire**: Lancaster Environment Centre, Lancaster University, Lancaster, UK

38 **David Mouillot**: MARBEC, Univ. Montpellier, CNRS, IFREMER, IRD, Montpellier,  
39 France

40 **Maria Mutis Martinezguerra:** Instituto de Investigaciones Marinas y Costeras-  
41 INVEMAR Museo de Historia Natural Marina de Colombia (MHNMC) Santa Marta  
42 Colombia

43 **Stéphanie Manel:** CEFE, Univ. Montpellier, CNRS, EPHE-PSL University, IRD,  
44 Montpellier, France

45 **Andrea Polanco Fernández:** Instituto de Investigaciones Marinas y Costeras-  
46 INVEMAR Museo de Historia Natural Marina de Colombia (MHNMC) Santa Marta  
47 Colombia

48 **Alice Valentini:** SPYGEN, Le Bourget-du-Lac, France

49 **Laure Velez:** MARBEC, Univ. Montpellier, CNRS, IFREMER, IRD, Montpellier,  
50 France

51 **Camille Albouy:** IFREMER, unité Écologie et Modèles pour l'Halieutique, Nantes,  
52 France

53 **Loïc Pellissier\*:** Landscape Ecology, Institute of Terrestrial Ecosystems, Department  
54 of Environmental Systems Science, ETH Zürich, Zürich, Switzerland & Unit of Land  
55 Change Science, Swiss Federal Research Institute WSL, Birmensdorf, Switzerland;  
56 loic.pellissier@usys.ethz.ch

57 **Conor Waldock\*:** Landscape Ecology, Institute of Terrestrial Ecosystems,  
58 Department of Environmental Systems Science, ETH Zürich, Zürich, Switzerland &  
59 Unit of Land Change Science, Swiss Federal Research Institute WSL, Birmensdorf,  
60 Switzerland; conor.waldock@usys.ethz.ch

61 \*corresponding authors

62 †lead authors

63

#### 64 **Keywords**

65 Environmental DNA, biomonitoring, tropical marine ecosystems, MOTU, sampling  
66 variability, coral reef diversity

67

68

69 **Abstract**

70 Quantifying the diversity of species in rich tropical marine environments remains  
71 challenging. Environmental DNA (eDNA) metabarcoding is a promising tool to face  
72 this challenge through the filtering, amplification, and sequencing of DNA traces from  
73 water samples. However, the reliability of biodiversity detection from eDNA samples  
74 can be low in marine environments because eDNA density is low and certainly  
75 patchy in this vast, heterogenous and dynamic environment. So, the number of  
76 sampling replicates and filtered volume necessary to obtain accurate estimates of  
77 biodiversity in rich tropical marine environments using eDNA metabarcoding is still  
78 unknown. Here, we used a paired sampling design of 30L per replicate on 68 reef  
79 transects from 8 sites in three tropical regions and identified fish Molecular  
80 Taxonomic Units (MOTUs) using a 12S marker. We quantified local biodiversity  
81 variation as MOTU richness, compositional turnover and compositional nestedness  
82 between replicated pairs of seawater samples. We report strong turnover of MOTUs  
83 between replicated pairs of samples undertaken in the same location, time, and  
84 conditions. Paired samples contained non-overlapping assemblages rather than  
85 subsets of one-another. As a result, localised diversity accumulation curves showed  
86 that even 6 replicates (180L) in the same location underestimated local diversity (for  
87 an area <1km). However, sampling of regional diversity using ~25 replicates in  
88 variable locations (often covering 10s of km) achieved saturation of biodiversity  
89 accumulation curves. Our results demonstrate high variability of diversity estimates  
90 perhaps arising from heterogeneous and local distribution of eDNA distribution in  
91 seawater or highly skewed frequencies of eDNA traces. This high compositional  
92 variability has consequences for using eDNA to monitor temporal and spatial  
93 biodiversity changes of local assemblages. Future biomonitoring efforts could be  
94 strongly undermined by a high level of false-negative detections under low replication  
95 protocols. We reveal the need to increase replicates or increase sampled water  
96 volume to better inform management of marine biodiversity using eDNA.

97

98

## 99 **Introduction**

100 Biodiversity is changing far faster than our ability to accurately quantify species  
101 losses and gains (Ceballos, Ehrlich and Raven, 2020; Filgueiras *et al.*, 2021), with  
102 consequent difficulties in evaluating the degradation of ecosystem functions and  
103 services upon which human well-being depends (Díaz *et al.*, 2019). Traditional  
104 methods such as visual surveys are very costly, time-consuming and require on-site  
105 taxonomic expertise (Kim and Byrne, 2006; Ballesteros-Mejia *et al.*, 2013; Dornelas  
106 *et al.*, 2019). Despite decades of sampling efforts, biodiversity monitoring still covers  
107 only a small fraction of global ecosystems and is particularly challenging in isolated  
108 and remote regions across the oceans (Collen *et al.*, 2009; Webb, Vanden Berghe  
109 and O'Dor, 2010; Dornelas *et al.*, 2018; Letessier *et al.*, 2019). An emerging tool for  
110 rapid biodiversity assessment is environmental DNA (eDNA) metabarcoding (Stat *et al.*,  
111 2017; Eble *et al.*, 2020), which is proving to be particularly effective for marine  
112 environments (Juhel *et al.*, 2020; Boulanger *et al.*, 2021; Holman *et al.*, 2021). eDNA-  
113 based methods rely on the detection of DNA fragments from various sources  
114 including faeces, shed skin cells, organelles, or extruded waste of animals, which  
115 become suspended in the water (Dejean *et al.*, 2012; Collins *et al.*, 2018; Harrison,  
116 Sunday and Rogers, 2019). Using filtered water and molecular analyses, eDNA  
117 metabarcoding can estimate biodiversity across kingdoms at different taxonomic  
118 levels without isolating any target organisms (Valentini *et al.*, 2016; Holman *et al.*,  
119 2021), and even without exhaustive genetic reference databases (Flynn *et al.*, 2015;  
120 Juhel *et al.*, 2020; Marques *et al.*, 2020, 2021). Overall, eDNA metabarcoding has the  
121 potential to overcome some limitations of common sampling methods by targeting  
122 complete species assemblages, detecting rare (Rees *et al.*, 2014), elusive (Boussarie  
123 *et al.*, 2018) or non-indigenous species (Ficetola *et al.*, 2008; Holman *et al.*, 2019)  
124 and is harmless to organisms and less time-consuming (Bohmann *et al.*, 2014; Smart  
125 *et al.*, 2016).

126 Yet, routine and widespread eDNA applications to marine ecosystems face  
127 multiple challenges (Hansen *et al.*, 2018) with variability introduced to biodiversity  
128 estimates from multiple sources that are still poorly understood (Bessey *et al.*, 2020;  
129 Juhel *et al.*, 2020; Rourke *et al.*, 2021; Thalinger *et al.*, 2021). For example, eDNA  
130 signals from source-species are weakened by the low biomass-to-water volume ratio  
131 and frequent movement of individuals (Moyer *et al.*, 2014). Further, long-persistence  
132 times, the long-distance transport and patchy aggregation of eDNA by currents,

133 introduce uncertainty linking eDNA signal-to-source (Andruszkiewicz *et al.*, 2019;  
134 Whitney *et al.*, 2021). Detection rates and resultant biodiversity estimates thus  
135 critically depend on eDNA (i) *origin* (source of an organism's genetic material shed  
136 into its environment), (ii) *state* (forms of eDNA), (iii) *transport* (e.g. through diffusion,  
137 flocculation or settling, currents or biological transport which can vary according to  
138 the depth) and (iv) *fate* (how eDNA degrades and decays) (Barnes and Turner, 2016;  
139 Harrison, Sunday and Rogers, 2019; Thalinger *et al.*, 2021). Besides, water  
140 chemistry, salinity and temperature affect the persistence of DNA particles which are  
141 best preserved in cold and alkaline waters with low exposure to solar radiation  
142 (Moyer *et al.*, 2014; Pilliod *et al.*, 2014; Strickler, Fremier and Goldberg, 2015; but  
143 see Mächler, Osathanukul and Altermatt, 2018). As a result, marine eDNA  
144 residence time ranges from a few hours to a few days and is shorter than in  
145 freshwater (Dejean *et al.*, 2011; Thomsen *et al.*, 2012). In contrast to freshwater  
146 systems, marine systems are very open with eDNA particles dispersed by  
147 oceanographic dynamics at local (e.g., tides, currents, and water stratification),  
148 regional (e.g., eddies) and large (e.g., thermohaline currents) scales in interaction  
149 with coastal morphology. Whilst significant dispersal of eDNA from its source may  
150 theoretically occur (Andruszkiewicz *et al.*, 2019; Eble *et al.*, 2020), many studies also  
151 indicate that eDNA detection is limited to a small spatio-temporal sampling window  
152 even in highly dynamic marine habitats (Port *et al.*, 2016; O'Donnell *et al.*, 2017;  
153 Yamamoto *et al.*, 2017; Jeunen, Knapp, Spencer, Lamare, *et al.*, 2019; Stat *et al.*,  
154 2019; West *et al.*, 2020; Boulanger *et al.*, 2021). If marine eDNA is sparse, widely  
155 transported, and heterogeneously distributed, then biodiversity estimates could be  
156 highly variable and eDNA sampling strategies may need to overcome this potentially  
157 high noise-to-signal ratio.

158           The most common approach for concentrating marine eDNA is water  
159 filtration along transects (Kumar, Eble and Gaither, 2020) but the appropriate amount  
160 of water to filter to overcome sampling variability remains underdetermined (e.g., 1L  
161 in Nguyen *et al.*, 2020 and 30L in Polanco Fernández *et al.*, 2020). An increased  
162 volume of water should lead to increased compositional similarity among replicates,  
163 but even at 2L 30-50% of the total species pool were missing in any given sample  
164 (Bessey *et al.*, 2020). The question remains whether a larger water volume, that  
165 integrates eDNA signals over multiple kilometres, can provide a less variable and  
166 more consistent estimate of biodiversity. If the net effects of ecological and

167 methodological sources of variability are low, we can expect the compositional  
168 similarity of repeated 30L eDNA replicates to be high. In contrast, high biodiversity  
169 turnover among replicates may suggest further development of sampling protocols is  
170 required.

171 In addition to the volume of water, a high level of eDNA sampling replication in  
172 the field can be required to reduce false negatives (species present but not detected)  
173 and improve the accuracy of biodiversity estimates. For example, 92 x 2L seawater  
174 samples accurately predict ( $R^2 = 0.92$ ) the distribution of species richness among fish  
175 families (Juhel *et al.*, 2020). Spatial diversity gradients have been recovered from  
176 only three 0.5L water samples in temperate (Thomsen *et al.*, 2012) and tropical  
177 systems (West *et al.*, 2020). However, West *et al.* (2020) report that more replicates  
178 were necessary to avoid false-negatives and fully sample diversity in a given site  
179 (>8). However, the number of sampling replicates have budget and time limitations  
180 (Ficetola *et al.*, 2015) – which require optimization to take full advantage of eDNA-  
181 based surveys.

182 Here, we compared biodiversity of replicated eDNA samples in terms of  
183 Molecular Operational Taxonomic Units (MOTUs) since genetic reference databases  
184 have many gaps for tropical fishes (Marques *et al.*, 2020). We assessed within-site  
185 MOTU richness, so local or  $\alpha$ -diversity, and between-sites MOTU dissimilarity, so  $\beta$ -  
186 diversity, separating the turnover and nestedness components (Baselga, 2012). We  
187 targeted tropical fishes across eight different sites within the Caribbean, Eastern  
188 Pacific, and Western Indian Ocean using the same standardised protocol. Over  
189 transects 2km long, we filtered 30L of water in a paired sample design. In addition,  
190 we performed a replication experiment in two locations by repeating transects  
191 multiple times in a ~24h period. Our objectives were to: (i) establish the extent of  
192 variation in fish diversity estimates from replicated eDNA samples collected at the  
193 same time, in the same location and under similar conditions, (ii) identify the number  
194 of eDNA replicates required to saturate fish diversity at a given site, (iii) compare the  
195 above patterns among three ecologically distinct tropical ocean regions, and (iv)  
196 examine whether our sampling protocol saturates regional fish biodiversity using  
197 between-transect species accumulation curves as an indication of sampling effort  
198 appropriate for regional biodiversity estimation. Given that we filtered far more water  
199 than previous saturation experiments, we may expect high eDNA recovery rates  
200 whereby MOTU richness and composition should be very similar among the paired

201 replicates – providing robust estimates of biodiversity. In this case, the replicate  
202 accumulation curve should saturate rapidly and reach an asymptotic maximum. In the  
203 opposite case, it would indicate that even a high volume of filtration and a large  
204 number of replicates would be required to inventory fish biodiversity regionally.  
205

## 206 **Methods**

### 207 *Sampling sites and eDNA sampling*

208 We filtered surface seawater across eight sampling sites in three different oceanic  
209 regions: Caribbean Sea, Western Indian Ocean and Eastern Pacific (Figure 1). At  
210 each of the eight sampling sites, several transects were carried out with at least two  
211 filtration replicates per transect (see Table 1). Filtration replicates per transect were  
212 performed simultaneously on either side of a small boat moving at 2-3 nautical miles  
213 per hour while filtering surface seawater for 30 minutes resulting in approximately  
214 30L of water filtered per replicate. The shape of 2km transect varied to match the  
215 configuration of the reefs but were always consistent between the compared  
216 replicates. eDNA sampling was performed with a filtration system composed of an  
217 Athena<sup>®</sup> peristaltic pump (Proactive Environmental Products LLC, Bradenton, Florida,  
218 USA; nominal flow of 1 Lmin<sup>-1</sup>), a VigiDNA<sup>®</sup> 0.2µM cross flow filtration capsule and  
219 disposable sterile tubing for each filtration capsule (SPYGEN, le Bourget du Lac,  
220 France). After filtration, the capsules were emptied, filled with 80 mL of CL1 lysis  
221 conservation buffer (SPYGEN, le Bourget du Lac, France) and stored at room  
222 temperature. A strict contamination protocol in field and laboratory stages was  
223 followed using disposable gloves and single-use filtration equipment. More details  
224 can be found in Polanco Fernández *et al.* (2020).

### 225 *eDNA processing, sequencing, and clustering*

226 eDNA extraction, PCR amplification, and purification prior to library preparation were  
227 performed in separate, dedicated rooms following the protocols described in Polanco  
228 Fernández *et al.* (2020) and Valentini *et al.* (2016). eDNA was amplified using the  
229 teleo primer pair, which targets a marker within the mitochondrial 12S ribosomal RNA  
230 gene and shows high accuracy to detect for both bony (*Actinopteri*) and cartilaginous  
231 fish (*Chondrichthyes*) (Collins *et al.*, 2019). The primers were 5'-labelled with an  
232 eight-nucleotide tag unique to each PCR replicate, allowing the assignment of each  
233 sequence to the corresponding sample during sequence analysis. Twelve PCR

234 replicates were run per sample, i.e. 24 per transect. Fifteen libraries were prepared  
235 using the MetaFast protocol (Fasteris). For seven libraries, paired-end sequencing (2  
236 × 125 bp) was carried out using an Illumina HiSeq 2500 sequencer on a HiSeq Rapid  
237 Flow Cell v2 using the HiSeq Rapid SBS Kit v2 (Illumina) and for the remaining eight  
238 libraries (Europa, Grande Glorieuse, Juan de Nova, Tromelin) the paired-end  
239 sequencing was carried on a MiSeq (2 × 125 bp) with the MiSeq Flow Cell Kit v3  
240 (Illumina), following the manufacturer's instructions. Library preparation and  
241 sequencing were performed at Fasteris facilities. Fifteen negative extraction controls  
242 and six negative PCR controls (ultrapure water, 12 replicates) were amplified per  
243 primer pair and sequenced in parallel to the samples to monitor possible  
244 contaminants.

245 To provide accurate diversity estimation in the absence of a complete genetic  
246 reference database, we used sequence clustering and stringent cleaning thresholds  
247 (Marques et al., 2020). Clustering was performed using the SWARM algorithm which  
248 uses sequence similarity and abundance patterns to cluster multiple variants of  
249 sequences into MOTUs (Fisher *et al.*, 2015b; Rognes *et al.*, 2016). First, sequences  
250 were merged using *vsearch* (Rognes *et al.*, 2016), *cutadapt* (Martin, 2011) was then  
251 used for demultiplexing and primer trimming and *vsearch* to remove sequences  
252 containing ambiguities. SWARM was then run with a minimum distance of one  
253 mismatch to make clusters (Marques et al., 2020). Once the MOTUs are generated,  
254 the most abundant sequence within each cluster is used as a representative  
255 sequence for taxonomic assignment. Then, a post-clustering curation algorithm  
256 (LULU) was applied to curate the data (Frøslev *et al.*, 2017). We finally removed all  
257 occurrences with less than 10 reads per PCR and all MOTUs present in only one  
258 PCR within the entire dataset. This additional step is necessary as PCR errors are  
259 unlikely to be present in more than one PCR occurrence and it removes spurious  
260 MOTUs inflating diversity estimates; see Marques *et al.*, (2020) for more details.

### 261 *MOTU richness*

262 We first compared MOTU local richness with the expected richness of the species  
263 pool in the eight sites. For this, we created a MOTU presence-absence matrix  
264 containing every replicate of each region and compiled fish species lists for each of  
265 the eight sites from the literature: Scattered Islands (Grande Glorieuse, number of  
266 species = 576; Europa Island, n = 506; Juan de Nova Island, n = 480; Tromelin



267 Island, n = 239; personal communication with Terres Australes et Antarctiques  
268 Francais; [www.taaf.fr](http://www.taaf.fr)), Tayrona Park (n = 515; SIBM, 2021), Providencia (n = 343;  
269 Robertson and Van Tassell, 2019), Malpelo (n = 257; Robertson and Allen, 2015)  
270 and Guadeloupe (n = 425; Froese and Pauly, 2000). To examine whether the  
271 transect MOTU richness varied among oceanic regions (n=3), we performed a  
272 Kruskal-Wallis rank sum test and related the MOTU richness per replicate to the site  
273 richness (from species lists) using a linear model. We also estimated the recovered  
274 MOTU richness for each filtration replicate per transect. We determined if the mean  
275  $\alpha$ -diversity differed between paired filtration replicates for a given transect using a  
276 Wilcoxon signed rank test.

### 277 *MOTU compositional dissimilarity*

278 To understand the variability in MOTUs recovered between filtration replicates we  
279 quantified the compositional similarity of MOTUs. We estimated the pairwise  
280 Jaccard's dissimilarity index ( $\beta_{jac}$ ) between filtration replicates per transect using the  
281 R package *vegan* (Oksanen *et al.*, 2019). The Jaccard index ranges from 0 (species  
282 composition between the replicates is identical, i.e., complete similarity) to 1 (no  
283 species in common between the replicates, i.e., complete dissimilarity). We  
284 partitioned the Jaccard index into turnover ( $\beta_{itu}$ ) and nestedness ( $\beta_{jne}$ ) components  
285 using the R package *betapart* (Baselga and Orme, 2012). Nestedness quantifies the  
286 extent to which replicates are subsets of each other. Turnover indicates the amount  
287 of species replacement among replicates, i.e., the substitution of species in one  
288 replicate by different species in the other one (Baselga and Orme, 2012; Legendre  
289 and De Cáceres, 2013). In addition, we tested whether  $\beta_{jac}$  differed between the  
290 regions using a Kruskal-Wallis rank sum test.

### 291 *Local-scale MOTU accumulation curves*

292 To analyse the local-scale richness accumulation, we repeated circular transects  
293 multiple times in Malpelo and Santa Marta. We sampled two locations in Santa Marta  
294 filtering 6 replicates at each within 20 hours, and one location in Malpelo filtering 10  
295 replicates within three days. This sampling design defined three local MOTU  
296 accumulation 'experiments'. We produced MOTU richness accumulation curves  
297 across filtration replicates from each location using the *specaccum* function from the  
298 R package *vegan* (Oksanen *et al.*, 2019). The 'random' method was used to  
299 generate 1,000 accumulation curves, which were used to fit models describing the

300 relationship between the number of replicates and MOTU richness. We fitted fourteen  
301 models to each saturation experiment and ranked fitted models by AIC score. We  
302 generated multi-model mean averages which were used for asymptote calculations,  
303 extrapolation and visualisation using the *sars\_average* function from the *sars* R  
304 package (Matthews *et al.*, 2019). We next used the *sar\_pred* function to extrapolate  
305 MOTU richness for up to 60 filtration replicates. We defined asymptotes as the  
306 number of replicates at which less than 1 new MOTU was added per additional  
307 sample.

308

### 309 *Regional-scale MOTU accumulation curves*

310 In contrast to the saturation curves at one location, we assessed the extent to which  
311 our eDNA protocol captures regional fish biodiversity. MOTU accumulation curves  
312 were calculated using all filtration replicates in each of the 8 sites. Species  
313 accumulation curves were produced and compared as above (Figure 1; Table 1)  
314 rather than within localised repeated transects. All transects and replicates from all  
315 stations within a sampling site were pooled to form a site-wide (or regional)  
316 accumulation curve.

317

318 All analyses were performed in R version 4.0.1 (R Core Team, 2020). The activities  
319 in Malpelo were undertaken with the permit: “Resolución Número 0170-2018 MD-  
320 DIMAR-SUBDEMAR-ALIT 8 de marzo de 2018”.

321

322 **Table 1.** Overview of eDNA sampling across regions and sites in our study. Filtration replicates  
 323 are our observation units, all samples in column ‘Total filtration replicates’ were used in our  
 324 accumulation curves. Only paired samples on a given transect were used in the ‘MOTU  
 325 compositional similarity between filtration replicates’ analyses, indicated by brackets in the ‘Total  
 326 filtration replicates’ column.

327

|                                     | Region                | Site             | Number of transects per site | Total filtration replicates |
|-------------------------------------|-----------------------|------------------|------------------------------|-----------------------------|
| <b>Local accumulation curves</b>    | Eastern Pacific Ocean | Malpelo          | 5                            | 10                          |
|                                     | Caribbean Sea         | Santa Marta (#1) | 1                            | 6                           |
|                                     |                       | Santa Marta (#2) | 3                            | 6                           |
| <b>Regional accumulation curves</b> | Western Indian Ocean  | Europa           | 6                            | 12 (12)                     |
|                                     |                       | Grande Glorieuse | 5                            | 10 (10)                     |
|                                     |                       | Juan de Nova     | 5                            | 9 (8)                       |
|                                     |                       | Tromelin         | 3                            | 6 (6)                       |
|                                     | Caribbean Sea         | Guadeloupe       | 18                           | 28 (16)                     |
|                                     |                       | Providencia      | 10                           | 20 (20)                     |
|                                     | Eastern Pacific Ocean | Malpelo          | 13                           | 24 (24)                     |
|                                     | Caribbean Sea         | Santa Marta      | 8                            | 20 (8)                      |

328

329

330

331

332

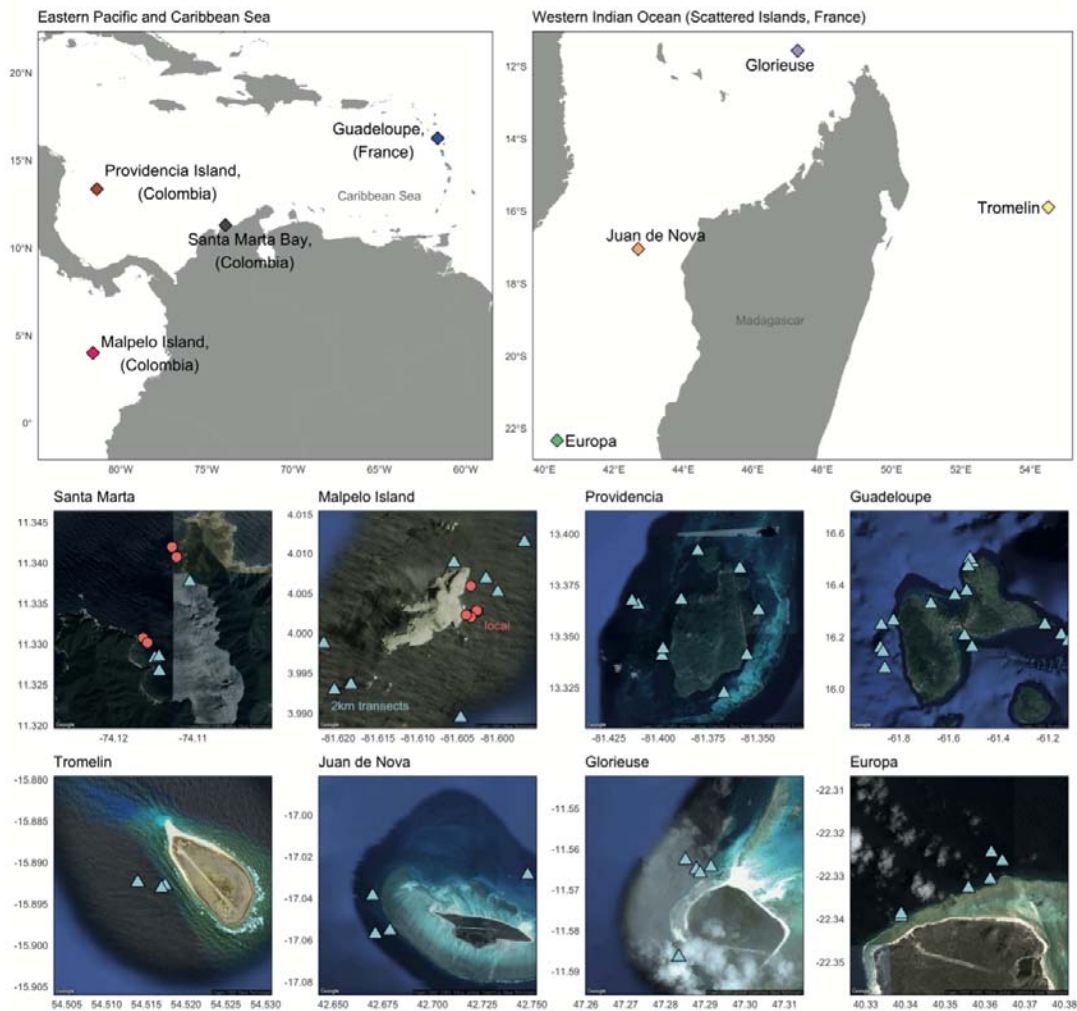

333

334 **Figure 1.** Sampling sites in the Eastern Pacific, Caribbean and Western Indian Ocean. The eight  
335 sampled sites represented by Google Earth imagery show the spatial distribution of transects  
336 within sites. Markers represent the beginning of eDNA transects in each site; colour and shape  
337 indicate whether samples were used in local accumulation analysis (static samples repeated  
338 multiple times in a shorter period, red circles) or regional/island level accumulation curves (blue  
339 triangles).

340

## 341 Results

### 342 Overview of eDNA biodiversity patterns

343 We detected a total of 789 unique MOTUs assigned to bony and cartilaginous fish  
344 taxa. Site MOTU richness was significantly and positively associated with the size of  
345 the site species pool (slope=0.1,  $t=4.7$ ,  $p<0.001$ ; Figure 2) reconstructing large-scale  
346 biodiversity gradients across the tropics.

347

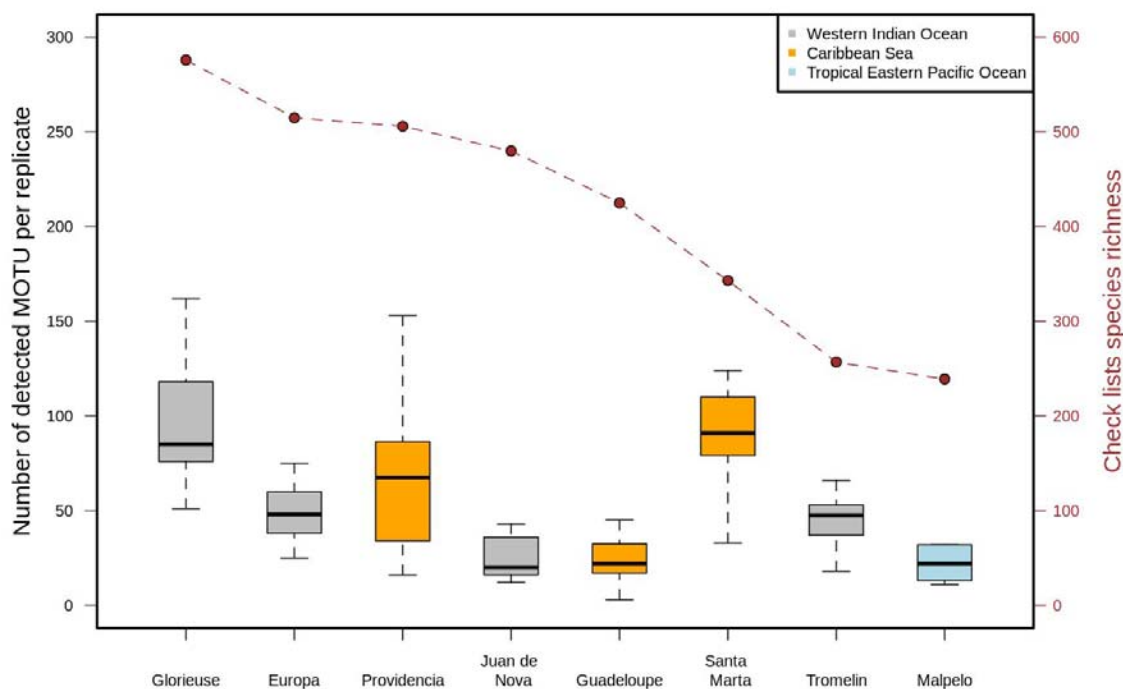

348

349 **Figure 2.** Sites ranked by their expected species richness based on species lists in different  
350 regions (see Methods). One single filtration replicate recovered up to 162 fish MOTUs in the most  
351 diverse site monitored. Overall, we found an association between the size of the species pool and  
352 the number of MOTUs recovered in a single replicate. The relatively consistent proportional  
353 MOTU samples from the full species pools suggests that in richer sites filtration replicates were  
354 not saturated with available eDNA. The bold central lines correspond to median values across  
355 transects (filtration replicate pairs), interquartile range (25th-75th) corresponds to box edges, and  
356 whiskers extend to 1.5 x interquartile range.

357 *MOTUs richness per replicate*

358 The fish MOTU richness detected by each filtration replicate (n = 100) ranged from 3  
359 to 162, with a mean of  $58.3 \pm 35.6$  MOTUs (Figure 2). The mean  $\alpha$ -diversity detected  
360 by each filtration replicate for a given transect did not differ significantly (Wilcoxon  
361 signed rank test: n = 50, Z = -0.927, p = 0.354). The MOTU richness detected at each  
362 transect (i.e., two filtration replicates combined, n = 50) ranged from 19 to 184, with a  
363 mean of  $82.5 \pm 42.7$  MOTUs and did not differ significantly among regions (Kruskal-  
364 Wallis rank sum test:  $\chi^2 = 4.0682$ ; p = 0.1308). On average, 69.7% of the MOTU  
365 richness along a transect was identified by a single filtration replicate, ranging from  
366 11.5% to 98.1%, with variations among regions (Western Indian Ocean = 63.6%, n =  
367 36; Eastern Pacific = 74.5%, n = 20; Caribbean = 72.5%, n = 44).

368 *MOTU compositional dissimilarity between replicates*

369 The composition of fish MOTUs was highly dissimilar between paired replicates  
370 (Figure 3; mean similarity =  $0.598 \pm 0.155$  where 1 is full dissimilarity with no MOTU  
371 is common), and varied among transects ranging from 0.174 to 0.882. The level of  
372 dissimilarity between paired replicates varied significantly among regions (Kruskal-  
373 Wallis rank sum test:  $\chi^2 = 22.791$ ; p < 0.001) being most dissimilar in the West Indian  
374 Ocean (mean =  $0.729 \pm 0.102$ ) than in the Caribbean ( $0.528 \pm 0.146$ ) and the Eastern  
375 Pacific ( $0.511 \pm 0.081$ ). MOTU compositional differences between replicates were  
376 primarily due to MOTU turnover (Figure 3; n = 49, Z = -6.097, p < 0.001; mean  
377 turnover =  $0.450 \pm 0.153$ ) with a lower contribution of nestedness (mean =  $0.149 \pm$   
378  $0.146$ ). Turnover ranged from 0.095 to 0.846 and nestedness from 0.005 to 0.646.

379

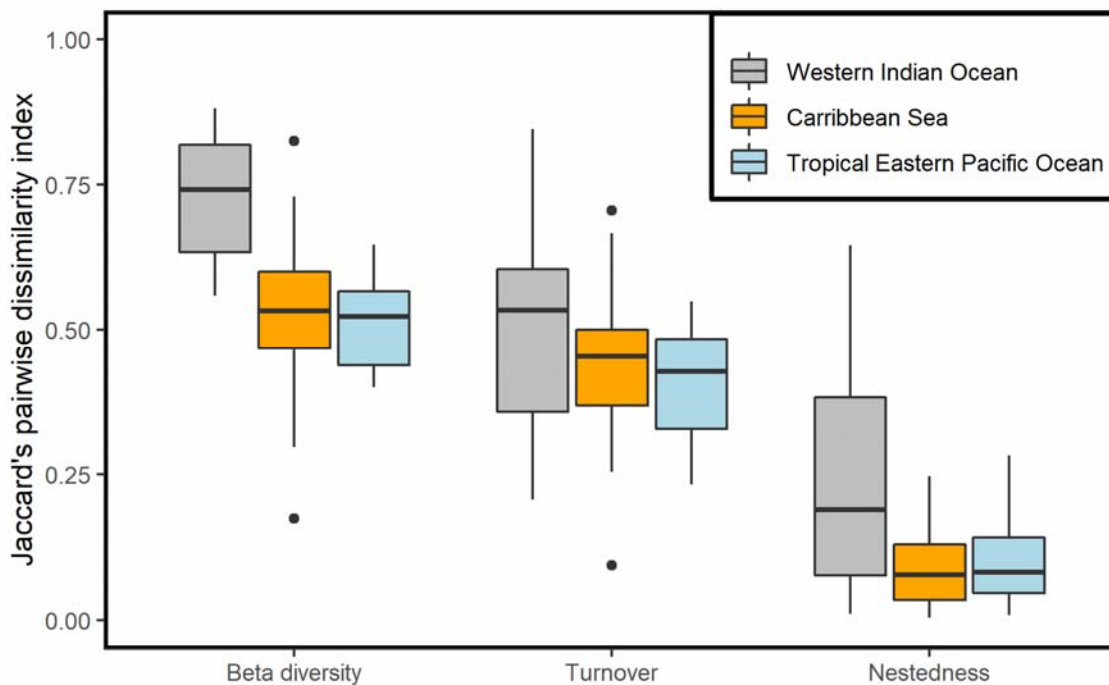

380

381 **Figure 3.** Boxplots of the MOTU compositional dissimilarity between eDNA filtration replicates ( $\beta$ -  
382 diversity), and deconstruction into turnover and nestedness components for three ocean regions.  
383 The bold central lines correspond to median values across transects (filtration replicate pairs),  
384 interquartile range (25th-75th) corresponds to box edges, and whiskers extend to 1.5 x  
385 interquartile range.

386

387 *Local-scale MOTU accumulation curves*

388 The accumulated fish MOTU richness in the two locations in Santa Marta was  
389 between 109 and 131 and the one location was 114. After 6-10 replicates sampling in  
390 the same location, MOTU richness did not fully saturate with additional replicates  
391 adding new MOTUs to the total (Figure 4). Modelled accumulation curves suggest  
392 that 27-58 filtration replicates would be required to reach an asymptotic richness of  
393 164-251 MOTUs in Santa Marta, and 23 filtration replicates to reach an asymptotic  
394 richness of 134 MOTUs in Malpelo.

395

396 *Regional-scale MOTU accumulation curves*

397 At a regional scale, MOTU accumulation curves detected various proportions of the  
398 total asymptotic MOTU richness (defined as <1 additional MOTU per filtration  
399 replicate; 98.8% on average in the Caribbean Sea, 103.3% on average in Malpelo,  
400 67.4% on average in the Western Indian Ocean). The Caribbean and Eastern Pacific  
401 filtration replicates saturated MOTU richness after 18 to 28 replicates (i.e., within our  
402 number of replicates), except for Santa Marta, where an additional 6 replicates are  
403 predicted to be required to reach an asymptote (Figure 5). In the Western Indian  
404 Ocean, where sampling was less exhaustive, regional MOTU richness did not  
405 saturate and reached between 46.4% (Tromelin) and 82.7% (Grande Glorieuse) of  
406 the predicted asymptotic MOTU richness. To reach an asymptotic richness of 172.3-  
407 320.2 MOTUs in the Western Indian Ocean, our estimates suggest that between 30-  
408 52 additional replicates would be required. The shapes of regional accumulation  
409 curves were qualitatively different between the three oceans and showed differing  
410 levels of both diversity and sampling exhaustiveness across sites (Figure 5).

411



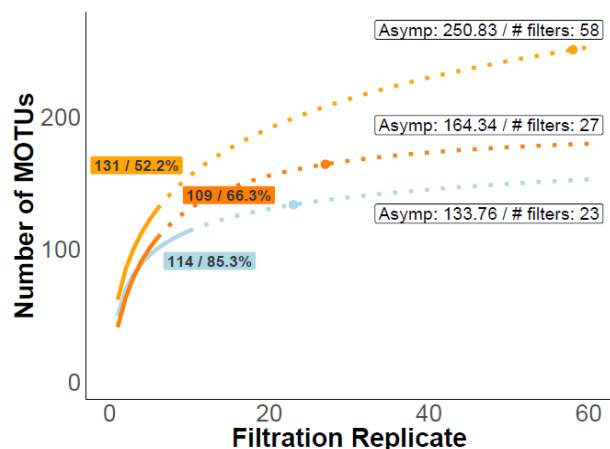

412 **Figure 4.** Local-scale MOTU richness accumulation analysis of eDNA filtration replicates from  
 413 Santa Marta and Malpelo. The curves show the multi-model mean average of the local MOTU  
 414 richness and richness extrapolation for the filtration replicates collected by repeated sampling at  
 415 the same location over a short period. Coloured text boxes indicate the final sampled richness  
 416 and the percentage of the estimated richness asymptote reached with our filtration replicates.  
 417 Points on the curve mark the asymptote (defined as a < 1 MOTU increase in species richness per  
 418 added sample). The asymptotic MOTU richness plus the number of filters required to reach the  
 419 asymptote are noted in the white text box next to the curves. The solid line shows the richness of  
 420 the filters collected during actual sampling; the dotted line is the extrapolation of richness up to 60  
 421 filters. The curve colour corresponds to the sampling regions: Santa Marta (light orange:  
 422 'tayrona\_camera\_1', dark orange: 'tayrona\_camera\_2'), Malpelo (blue).  
 423

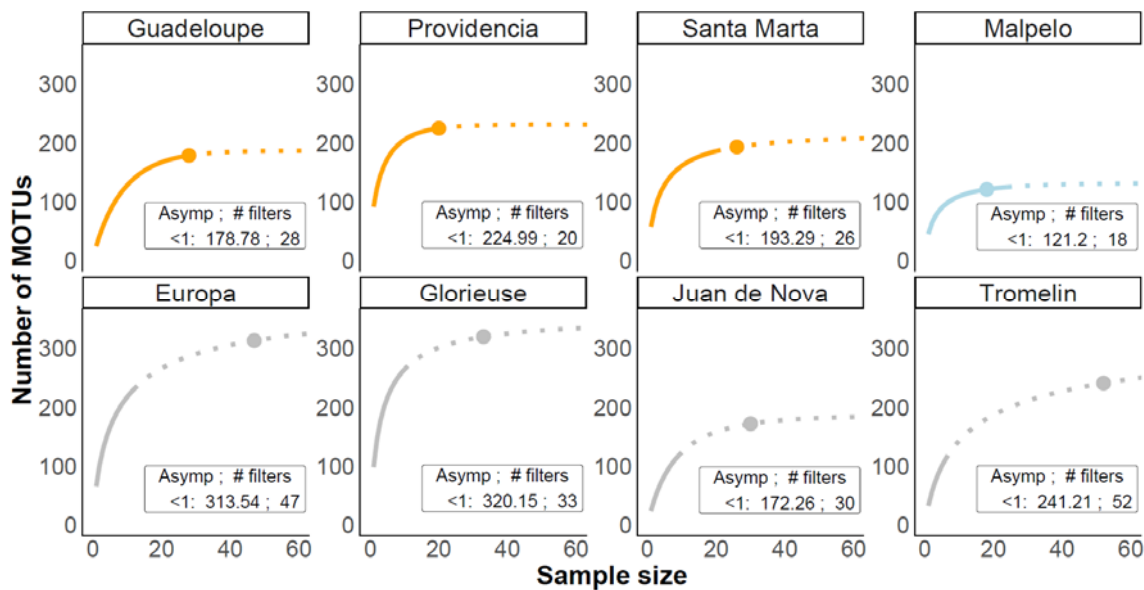

424  
 425 **Figure 5.** Regional MOTU richness accumulation curves of eDNA filtration replicates across the  
 426 Caribbean, Eastern Pacific and Western Indian Ocean. The curves show the multi-model mean  
 427 averages of the local richness and richness extrapolation (number of MOTUs) for the number of  
 428 filters (sample size) from each region. Points on the curve represent the asymptote (defined as a  
 429 less than 1 MOTU increase in species richness per added sample). The asymptote for the MOTU  
 430 richness plus the number of filters needed to reach the asymptote are noted in the text box below  
 431 the curves. The solid line shows the richness of the filters collected; the dotted line is the  
 432 extrapolation of richness up to 60 filters. The colours of the curves correspond to the sampling  
 433 area: Caribbean Sea (orange), Eastern Pacific (light blue), Western Indian Ocean (grey).

## 434 **Discussion**

435 Our results reveal that, without adequate replication, sampling variability undermines  
436 biodiversity estimates in highly diverse tropical ecosystems, such as coral reefs  
437 (Cilleros *et al.*, 2019; Bessey *et al.*, 2020; Juhel *et al.*, 2020; Polanco Fernández *et*  
438 *al.*, 2020). The variability of eDNA biodiversity estimates showed high compositional  
439 dissimilarity between filtration replicates so, for some locations, even extensive  
440 sampling with 6-20x 30L replicates could reach an asymptotic number of detected  
441 MOTUs. Promisingly, there was little difference in overall MOTU richness between  
442 paired replicates, although these replicates recovered different species identities so  
443 are essential in eDNA sampling design.

444 The similar MOTU richness but different composition between replicates  
445 suggest that eDNA distribution varies at a fine-scale in seawater and is certainly  
446 patchier than previously thought. This patchiness of fish eDNA in tropical reefs is  
447 further supported by Bessey *et al.* (2020) who report that multiple collections from a  
448 single site 2m apart have <30% overlapping species detections. The fine-scale  
449 distribution of eDNA in the environment could be a function of multiple factors. For  
450 example, ambient eDNA in seawater could be modified by complex sea currents,  
451 surface slicks (Whitney *et al.*, 2021), local water dynamics, thermohaline circulation  
452 forces, spatio-temporal variation in organism activity and behaviours (e.g., spawning,  
453 feeding, diel migrations), different DNA shedding, degradation and decay rates  
454 (Harrison, Sunday and Rogers, 2019). Identifying when, where, and to what extent  
455 these varying processes act to modify spatial and temporal eDNA distribution is  
456 critical to disentangle biodiversity variation from sampling variation on reefs.

457 Since biodiversity changes are most often detected as compositional turnover,  
458 but not necessarily richness changes, we highlight a major challenge in developing  
459 eDNA to monitor ecosystem modifications through space and time (Dornelas *et al.*,  
460 2014; Hill *et al.*, 2016; Santini *et al.*, 2017; Blowes *et al.*, 2019). Our results imply that  
461 if sample variability is not accounted for, or survey designs are not well replicated,  
462 eDNA-derived time-series could over-emphasise compositional turnover by  
463 containing many false-negatives. This point will be exacerbated where incomplete  
464 reference databases recover a small portion of common species and falsely identify  
465 low species turnover among samples (Schenekar *et al.*, 2020), even though MOTU  
466 turnover identified here may be very high. We found MOTU compositional differences

467 between replicates to be higher in the more speciose Western Indian Ocean (under  
468 similar sampling protocols), perhaps due to the larger species pool, further  
469 challenging eDNA applications in most diverse tropical systems (Juhel *et al.* 2020).  
470 Current protocols should be cautiously applied to biomonitoring if such limitations  
471 remain unresolved. Our results also imply that many replicates of >30L water are  
472 needed to reach a stable estimate of total local biodiversity. Promisingly, the regional  
473 biodiversity of tropical systems was relatively well-quantified through repeated eDNA  
474 sampling (e.g., Figure 5), and more exhaustive biodiversity estimates may be  
475 achieved by including mesophotic coral ecosystems (from -300m depth to sub-  
476 surface) and various habitats (e.g. lagoons, reef-slope, mangroves, sea grass) (Juhel  
477 *et al.* 2020).

478         The well-established community pattern that many species are rare and few  
479 are common (McGill *et al.*, 2007) also likely exists in eDNA particles. Moreover,  
480 finding rare eDNA fragments in any given sample may be exacerbated by features of  
481 marine systems. For example, we likely sampled vagrant open-ocean species, which  
482 only pass through temporarily, in some of our remote sites (e.g., Malpelo) which may  
483 have increased sampling variability. Compared to terrestrial systems, the seawater  
484 environment may homogenise eDNA that comes from different habitats (e.g., coral,  
485 rock, sand, seagrass). The eDNA species pool could be larger in a seawater sample  
486 than expected based on habitat variation along a given transect. Dispersion of eDNA  
487 between distinct habitats (e.g., from seagrass beds to coral reefs) would enhance the  
488 likelihood of finding a rare habitat specialist from a different habitat type and  
489 increasing perceived sampling variability. As such, eDNA variability may be greater in  
490 seascapes with a greater diversity of habitats. Sampling designs may need to  
491 account for the extent that a given water body accumulates sources of eDNA, and  
492 the amount of habitat variation that a water sample signal is aggregated over. eDNA  
493 statistical analyses may also need to control for habitat variations before reaching  
494 conclusions (Boulanger *et al.*, 2021).

495         Marine eDNA protocols are challenged by the compositional turnover between  
496 replicates. As in traditional approaches, saturation of biodiversity samples only  
497 occurs with many replicates on tropical reefs (MacNeil *et al.*, 2008). However,  
498 traditional methods like underwater visual census (UVC) and baited remote  
499 underwater video (BRUVs) are systematically biased by observer effects and fish

500 behaviour, leading to false negatives for cryptic and elusive species (Ackerman and  
501 Bellwood, 2000; MacNeil *et al.*, 2008; Bernard *et al.*, 2013). For example, we found  
502 ~30 Chondrichthyes species that typically would not be encountered on visual  
503 surveys (e.g., 2 *Mobula sp.*, 6 *Carcharhinus sp.*; Polanco Fernández *et al.*, 2020),  
504 among other elusive and endangered megafauna that have been uncovered during  
505 similar sampling regimes (Juhel *et al.*, 2021). We highlight that eDNA replicates may  
506 be affected by factors that contribute to the precision of biodiversity estimates, rather  
507 than a biased biodiversity signal as obtained with UVC or BRUVs, e.g. a lack of  
508 eDNA in water samples leading to availability errors; although see Stat *et al.*, (2019)  
509 for biases against specific genera and Kelly, Shelton and Gallego, (2019) for  
510 discussions of primer efficiency biases.

511 Coral reefs are extremely speciose (Fisher *et al.*, 2015a; Edgar *et al.*, 2017),  
512 and thus 60L (two replicates) or even 180L (six replicates) does not seem to capture  
513 the extent of local biodiversity. Instead, in support of other eDNA studies that filtered  
514 far less water, our replicates only sampled a portion of diversity (DiBattista *et al.*,  
515 2017; Jeunen, Knapp, Spencer, Taylor, *et al.*, 2019; Koziol *et al.*, 2019; Sigsgaard *et al.*,  
516 2019; Stat *et al.*, 2019; Bessey *et al.*, 2020; Juhel *et al.*, 2020). In temperate  
517 systems, 20L of water was sufficient for fish family richness to saturate (Koziol *et al.*,  
518 2019; but see Evans *et al.*, 2017), but tropical systems are more challenging to  
519 monitor. The number of eDNA replicates to ensure tropical fish diversity saturation  
520 varies widely. For example, 32-39 samples of 0.5L of water began to saturate fish  
521 genera diversity in western Australia (Stat *et al.*, 2019), but 92 samples of 2L did not  
522 saturate diversity in West Papua, Indonesia, a hotspot of fish diversity (Juhel *et al.*,  
523 2020). Furthermore, even the largest sample of 2L in Bessey *et al.* (2020) only  
524 detected <43% (75/176) of the total species pool reported in the Timor Sea.

525 eDNA accumulation curves often confound site-accumulated (regional) and  
526 replicate-accumulated (local) diversity presenting challenges for replicate number  
527 and water volume refinements (but see Bessey *et al.* 2020). Comparing available  
528 estimates, integrative sampling (performed here), rather than point sampling, e.g.,  
529 Stat *et al.*, (2019) and Juhel *et al.* (2020), appears very promising. For example, in  
530 Caribbean and Eastern Pacific sites within ~25 filters we find additional filters added  
531 only <1 MOTU. Previous works using point samples have far higher sampling  
532 numbers, and higher bioinformatic costs per filter so leading to apparently lower cost-

533 effectiveness (unless filters are aggregated at the DNA extraction step; e.g., Stat *et*  
534 *al.*, 2019; Juhel *et al.*, 2020). Future work should optimise sampling designs and the  
535 trade-off between water sample volume and replicate number, which we only partially  
536 explore, and how these factors contribute to the precision of biodiversity estimates in  
537 controlled settings (Miya *et al.*, 2015). For example, if sampling nearer to substrate  
538 bottoms greatly improves recovery of eDNA this additional cost (e.g., divers,  
539 submersibles, and additional expertise) could work out as a cost-effective solution to  
540 address surface sampling variability. Another option would be to use previous  
541 knowledge of biodiversity in each site to adapt the number of replicates to reach  
542 expected saturation.

543         A similar pattern of low compositional similarity, and consistent richness in  
544 replicates, could arise if filters saturate with eDNA and prevent the full quantification  
545 of biodiversity. Our analyses suggest this is unlikely because the richness recovered  
546 from the eDNA filters was associated with the size of the species pools, which would  
547 be unexpected if filters had a maximum richness capacity that was reached  
548 consistently. Furthermore, we might expect nestedness to be more important if filters  
549 or PCR processes were first saturated with the most commonly available eDNA, but  
550 we found MOTU compositional differences between replicates were more strongly  
551 related to turnover than nestedness. Finally, if filters first saturate with common  
552 species, eDNA recovery of rare species would be limited but in our eDNA protocol we  
553 find many species that remain undetected or rare in visual surveys (Polanco  
554 Fernández *et al.*, 2020). Promisingly, this suggests not only that our sampling  
555 protocol is robust but also that sampling and filtering an even greater water volume  
556 per filtration replicate is a feasible approach to better quantify the high fish diversity of  
557 coral reefs. Given the low biomass-to-water ratio in marine systems a high volume of  
558 filtered water is likely a prerequisite to have a representative sampling of the marine  
559 environment (Bessey *et al.*, 2020). However, other parameters must be considered  
560 and explored in the future to identify whether physicochemical and local  
561 oceanographic conditions introduce variability in biodiversity estimates.

## 562 **Conclusion**

563 Our findings underline both the promises and limitations of eDNA derived biodiversity  
564 estimates in hyper-diverse tropical ecosystems. On one hand, local richness  
565 estimation appears to rapidly resolve broad-scale richness patterns of under-

566 documented tropical marine biodiversity (Costello *et al.*, 2010; Menegotto and  
567 Rangel, 2018). On the other hand, high stochasticity between samples urges  
568 cautious application to biomonitoring, and further protocol refinement, to avoid  
569 misattribution of biodiversity trends to detection errors. A better understanding of the  
570 behaviour of eDNA in diverse physicochemical marine environments will help design  
571 more effective eDNA sampling protocols and disentangle sampling errors from true  
572 biodiversity patterns (Harrison, Sunday and Rogers, 2019). Resolving whether more  
573 replicates, or greater water volumes, leads to higher probability of eDNA recovery is  
574 critical for cost-effective eDNA protocols – but integrative sampling of tens of litres  
575 along boat transects appears a promising approach. We also recommend testing  
576 various water sampling strategies, for example sampling not only surface water, but  
577 taking eDNA along a depth gradient where the ecology of eDNA may differ.  
578 Physicochemical parameters of the water bodies could be important to consider  
579 when designing the eDNA sampling strategy. Accurate, cheap and fast biodiversity  
580 estimates are critically needed to monitor changes in the Anthropoc ocean. Current  
581 eDNA protocols provide higher and more realistic estimates of biodiversity than  
582 traditional methods for a given sampling effort. This opens very promising and  
583 realistic perspectives to quantify biodiversity since increasing the volume of water  
584 filtered and replicates numbers is feasible, particularly in regions with high  
585 biodiversity. Further refinement of our marine eDNA protocol will better quantify,  
586 monitor, and manage changing tropical marine biodiversity.

587

588 **Acknowledgements**

589 This project was supported by the ETH Global grant and the Monaco Explorations  
590 Foundation, CORALINA, which provided support for entrance to the island of  
591 Providencia for the development of the project and maritime support for the field  
592 sampling. SB and FL were supported by the Fondo Patrimonial de Malpelo, Parques  
593 Nacionales Naturales de Colombia and Ministerio de Ambiente de Colombia. GHBP,  
594 MMM and APF were supported by the Instituto de Investigaciones Marinas y  
595 Costeras (INVEMAR) through the project “Investigación científica hacia la generación  
596 de información y conocimiento de las zonas marinas y costeras de interés de la  
597 nación”, BPIN code 2017011000113. LP received funding from the Swiss National  
598 Science Foundation for the project Reefish (grant number 310030E-164294). CA was  
599 funded by an “étoile montante” fellowship from the “pays de la loire” region (grant  
600 number 2020\_10792). EM was supported by the FAIRFISH project (ERC starting  
601 grant: 759457). We thank SPYGEN staff for technical support in the laboratory and  
602 are grateful to PE Guerin for his support in bioinformatics pipeline development.

603 **Data Accessibility Statement**

604 We agree to archive our data in a public repository on acceptance.

605 **Reference list**

- 606 Ackerman, J. L. and Bellwood, D. R. (2000) 'Reef fish assemblages: A re-evaluation  
607 using enclosed rotenone stations', *Marine Ecology Progress Series*, 206(1954), pp.  
608 227–237. doi: 10.3354/meps206227.
- 609 Andruszkiewicz, E. A. *et al.* (2019) 'Modeling Environmental DNA Transport in the  
610 Coastal Ocean Using Lagrangian Particle Tracking', *Frontiers in Marine Science*,  
611 6(JUL), pp. 1–14. doi: 10.3389/fmars.2019.00477.
- 612 Ballesteros-Mejia, L. *et al.* (2013) 'Mapping the biodiversity of tropical insects:  
613 species richness and inventory completeness of African sphingid moths', *Global*  
614 *Ecology and Biogeography*, 22(5), pp. 586–595. doi: 10.1111/geb.12039.
- 615 Barnes, M. A. and Turner, C. R. (2016) 'The ecology of environmental DNA and  
616 implications for conservation genetics', *Conservation Genetics*. Springer Netherlands,  
617 17(1), pp. 1–17. doi: 10.1007/s10592-015-0775-4.
- 618 Baselga, A. (2012) 'The relationship between species replacement, dissimilarity  
619 derived from nestedness, and nestedness', *Global Ecology and Biogeography*,  
620 21(12), pp. 1223–1232. doi: 10.1111/j.1466-8238.2011.00756.x.
- 621 Baselga, A. and Orme, C. D. L. (2012) 'Betapart: An R package for the study of beta  
622 diversity', *Methods in Ecology and Evolution*, 3(5), pp. 808–812. doi: 10.1111/j.2041-  
623 210X.2012.00224.x.
- 624 Bernard, A. T. F. *et al.* (2013) 'Observer bias and detection probability in underwater  
625 visual census of fish assemblages measured with independent double-observers',  
626 *Journal of Experimental Marine Biology and Ecology*. Elsevier B.V., 443, pp. 75–84.  
627 doi: 10.1016/j.jembe.2013.02.039.
- 628 Bessey, C. *et al.* (2020) 'Maximizing fish detection with eDNA metabarcoding',  
629 *Environmental DNA*, 2(4), pp. 493–504. doi: 10.1002/edn3.74.
- 630 Blowes, S. A. *et al.* (2019) 'The geography of biodiversity change in marine and  
631 terrestrial assemblages', *Science*, 366(6463), pp. 339–345. doi:  
632 10.1126/science.aaw1620.
- 633 Bohmann, K. *et al.* (2014) 'Environmental DNA for wildlife biology and biodiversity  
634 monitoring', *Trends in Ecology and Evolution*. Elsevier Ltd, 29(6), pp. 358–367. doi:  
635 10.1016/j.tree.2014.04.003.
- 636 Boulanger, E. *et al.* (2021) 'Environmental DNA metabarcoding reveals and unpacks  
637 a biodiversity conservation paradox in Mediterranean marine reserves', *Proceedings*  
638 *of the Royal Society B: Biological Sciences*, 288(1949), p. rspb.2021.0112. doi:  
639 10.1098/rspb.2021.0112.
- 640 Boussarie, G. *et al.* (2018) 'Environmental DNA illuminates the dark diversity of  
641 sharks', *Science Advances*, 4(5). doi: 10.1126/sciadv.aap9661.
- 642 Ceballos, G., Ehrlich, P. R. and Raven, P. H. (2020) 'Vertebrates on the brink as  
643 indicators of biological annihilation and the sixth mass extinction', *Proceedings of the*  
644 *National Academy of Sciences of the United States of America*, 117(24), pp. 13596–  
645 13602. doi: 10.1073/pnas.1922686117.
- 646 Cilleros, K. *et al.* (2019) 'Unlocking biodiversity and conservation studies in high-  
647 diversity environments using environmental DNA (eDNA): A test with Guianese



- 648 freshwater fishes', *Molecular Ecology Resources*, 19(1), pp. 27–46. doi:  
649 10.1111/1755-0998.12900.
- 650 Collen, B. *et al.* (2009) 'Monitoring Change in Vertebrate Abundance: the Living  
651 Planet Index', *Conservation Biology*, 23(2), pp. 317–327. doi: 10.1111/j.1523-  
652 1739.2008.01117.x.
- 653 Collins, R. A. *et al.* (2018) 'Persistence of environmental DNA in marine systems',  
654 *Communications Biology*. Springer US, 1(1), p. 185. doi: 10.1038/s42003-018-0192-  
655 6.
- 656 Collins, R. A. *et al.* (2019) 'Non-specific amplification compromises environmental  
657 DNA metabarcoding with COI', *Methods in Ecology and Evolution*, 10(11), pp. 1985–  
658 2001. doi: 10.1111/2041-210X.13276.
- 659 Costello, M. J. *et al.* (2010) 'A census of marine biodiversity knowledge, resources,  
660 and future challenges', *PLoS ONE*, 5(8). doi: 10.1371/journal.pone.0012110.
- 661 Dejean, T. *et al.* (2011) 'Persistence of Environmental DNA in Freshwater  
662 Ecosystems', *PLoS ONE*. Edited by J. A. Gilbert, 6(8), p. e23398. doi:  
663 10.1371/journal.pone.0023398.
- 664 Dejean, T. *et al.* (2012) 'Improved detection of an alien invasive species through  
665 environmental DNA barcoding: the example of the American bullfrog *Lithobates*  
666 *catesbeianus*', *Journal of Applied Ecology*, 49(4), pp. 953–959. doi: 10.1111/j.1365-  
667 2664.2012.02171.x.
- 668 Díaz, S. *et al.* (2019) *IPBES (2019): Summary for policymakers of the global*  
669 *assessment report on biodiversity and ecosystem services of the Intergovernmental*  
670 *Science-Policy Platform on Biodiversity and Ecosystem Services*. Available at:  
671 [https://ipbes.net/system/tdf/ipbes\\_global\\_assessment\\_report\\_summary\\_for\\_policymakers.pdf?file=1&type=node&id=35329](https://ipbes.net/system/tdf/ipbes_global_assessment_report_summary_for_policymakers.pdf?file=1&type=node&id=35329).  
672
- 673 DiBattista, J. D. *et al.* (2017) 'Assessing the utility of eDNA as a tool to survey reef-  
674 fish communities in the Red Sea', *Coral Reefs*. Springer Berlin Heidelberg, 36(4), pp.  
675 1245–1252. doi: 10.1007/s00338-017-1618-1.
- 676 Dornelas, M. *et al.* (2014) 'Assemblage Time Series Reveal Biodiversity Change but  
677 Not Systematic Loss', *Science*, 344(6181), pp. 296–299. doi:  
678 10.1126/science.1248484.
- 679 Dornelas, M. *et al.* (2018) 'BioTIME: A database of biodiversity time series for the  
680 Anthropocene', *Global Ecology and Biogeography*, 27(7), pp. 760–786. doi:  
681 10.1111/geb.12729.
- 682 Dornelas, M. *et al.* (2019) 'Towards a microscope: Leveraging technology to  
683 transform the breadth, scale and resolution of macroecological data', *Global Ecology*  
684 *and Biogeography*, 28(12), pp. 1937–1948. doi: 10.1111/geb.13025.
- 685 Eble, J. A. *et al.* (2020) *Marine environmental DNA: Approaches, applications, and*  
686 *opportunities*. 1st edn, *Advances in Marine Biology*. 1st edn. Elsevier Ltd. doi:  
687 10.1016/bs.amb.2020.01.001.
- 688 Edgar, G. J. *et al.* (2017) 'Abundance and local-scale processes contribute to multi-  
689 phyla gradients in global marine diversity', *Science Advances*, 3(10), p. e1700419.  
690 doi: 10.1126/sciadv.1700419.

- 691 Evans, N. T. *et al.* (2017) 'Fish community assessment with eDNA metabarcoding:  
692 effects of sampling design and bioinformatic filtering', *Canadian Journal of Fisheries  
693 and Aquatic Sciences*, 74(9), pp. 1362–1374. doi: 10.1139/cjfas-2016-0306.
- 694 Ficetola, G. F. *et al.* (2008) 'Species detection using environmental DNA from water  
695 samples', *Biology Letters*, 4(4), pp. 423–425. doi: 10.1098/rsbl.2008.0118.
- 696 Ficetola, G. F. *et al.* (2015) 'Replication levels, false presences and the estimation of  
697 the presence/absence from eDNA metabarcoding data', *Molecular Ecology  
698 Resources*, 15(3), pp. 543–556. doi: 10.1111/1755-0998.12338.
- 699 Filgueiras, B. K. C. *et al.* (2021) 'Winner–Loser Species Replacements in Human-  
700 Modified Landscapes', *Trends in Ecology and Evolution*. Elsevier Ltd, 36(6), pp. 545–  
701 555. doi: 10.1016/j.tree.2021.02.006.
- 702 Fisher, R. *et al.* (2015a) 'Species richness on coral reefs and the pursuit of  
703 convergent global estimates', *Current Biology*. Elsevier Ltd, 25(4), pp. 500–505. doi:  
704 10.1016/j.cub.2014.12.022.
- 705 Fisher, R. *et al.* (2015b) 'Species Richness on Coral Reefs and the Pursuit of  
706 Convergent Global Estimates', *Current Biology*, 25(4), pp. 500–505. doi:  
707 10.1016/j.cub.2014.12.022.
- 708 Flynn, J. M. *et al.* (2015) 'Toward accurate molecular identification of species in  
709 complex environmental samples: testing the performance of sequence filtering and  
710 clustering methods', *Ecology and Evolution*, 5(11), pp. 2252–2266. doi:  
711 10.1002/ece3.1497.
- 712 Froese, R. and Pauly, D. (2000) *FishBase 2000: concepts, design and data sources*.  
713 ICLARM, Los Banos, Laguna, Philippines.
- 714 Frøslev, T. G. *et al.* (2017) 'Algorithm for post-clustering curation of DNA amplicon  
715 data yields reliable biodiversity estimates', *Nature Communications*. Springer US,  
716 8(1), p. 1188. doi: 10.1038/s41467-017-01312-x.
- 717 Hansen, B. K. *et al.* (2018) 'The sceptical optimist: challenges and perspectives for  
718 the application of environmental DNA in marine fisheries', *Fish and Fisheries*, 19(5),  
719 pp. 751–768. doi: 10.1111/faf.12286.
- 720 Harrison, J. B., Sunday, J. M. and Rogers, S. M. (2019) 'Predicting the fate of eDNA  
721 in the environment and implications for studying biodiversity', *Proceedings of the  
722 Royal Society B: Biological Sciences*, 286(1915), p. 20191409. doi:  
723 10.1098/rspb.2019.1409.
- 724 Hill, S. L. L. *et al.* (2016) 'Reconciling Biodiversity Indicators to Guide Understanding  
725 and Action', *Conservation Letters*, 9(6), pp. 405–412. doi: 10.1111/conl.12291.
- 726 Holman, L. E. *et al.* (2019) 'Detection of introduced and resident marine species  
727 using environmental DNA metabarcoding of sediment and water', *Scientific Reports*,  
728 9(1), pp. 1–11. doi: 10.1038/s41598-019-47899-7.
- 729 Holman, L. E. *et al.* (2021) 'Animals, protists and bacteria share marine  
730 biogeographic patterns', *Nature Ecology & Evolution*. Springer US. doi:  
731 10.1038/s41559-021-01439-7.
- 732 Jeunen, G. J., Knapp, M., Spencer, H. G., Lamare, M. D., *et al.* (2019)  
733 'Environmental DNA (eDNA) metabarcoding reveals strong discrimination among

- 734 diverse marine habitats connected by water movement', *Molecular Ecology*  
735 *Resources*, 19(2), pp. 426–438. doi: 10.1111/1755-0998.12982.
- 736 Jeunen, G. J., Knapp, M., Spencer, H. G., Taylor, H. R., *et al.* (2019) 'Species-level  
737 biodiversity assessment using marine environmental DNA metabarcoding requires  
738 protocol optimization and standardization', *Ecology and Evolution*, 9(3), pp. 1323–  
739 1335. doi: 10.1002/ece3.4843.
- 740 Juhel, J. *et al.* (2021) 'Detection of the elusive Dwarf sperm whale ( *Kogia sima* )  
741 using environmental DNA at Malpelo island (Eastern Pacific, Colombia)', *Ecology and*  
742 *Evolution*, 11(7), pp. 2956–2962. doi: 10.1002/ece3.7057.
- 743 Juhel, J. B. *et al.* (2020) 'Accumulation curves of environmental DNA sequences  
744 predict coastal fish diversity in the coral triangle: EDNA predict fish diversity',  
745 *Proceedings of the Royal Society B: Biological Sciences*, 287(1930). doi:  
746 10.1098/rspb.2020.0248rspb20200248.
- 747 Kelly, R. P., Shelton, A. O. and Gallego, R. (2019) 'Understanding PCR Processes to  
748 Draw Meaningful Conclusions from Environmental DNA Studies', *Scientific Reports*,  
749 9(1), pp. 1–14. doi: 10.1038/s41598-019-48546-x.
- 750 Kim, K. C. and Byrne, L. B. (2006) 'Biodiversity loss and the taxonomic bottleneck:  
751 Emerging biodiversity science', *Ecological Research*, 21(6), pp. 794–810. doi:  
752 10.1007/s11284-006-0035-7.
- 753 Koziol, A. *et al.* (2019) 'Environmental DNA metabarcoding studies are critically  
754 affected by substrate selection', *Molecular Ecology Resources*, 19(2), pp. 366–376.  
755 doi: 10.1111/1755-0998.12971.
- 756 Kumar, G., Eble, J. E. and Gaither, M. R. (2020) 'A practical guide to sample  
757 preservation and pre-PCR processing of aquatic environmental DNA', *Molecular*  
758 *Ecology Resources*, 20(1), pp. 29–39. doi: 10.1111/1755-0998.13107.
- 759 Letessier, T. B. *et al.* (2019) 'Correction: Remote reefs and seamounts are the last  
760 refuges for marine predators across the Indo-Pacific', *PLOS Biology*, 17(9), p.  
761 e3000489. doi: 10.1371/journal.pbio.3000489.
- 762 Mächler, E., Osathanukul, M. and Altermatt, F. (2018) 'Shedding light on eDNA:  
763 neither natural levels of UV radiation nor the presence of a filter feeder affect eDNA-  
764 based detection of aquatic organisms', *PLoS ONE*, 13(4), pp. 1–15. doi:  
765 10.1371/journal.pone.0195529.
- 766 MacNeil, M. A. *et al.* (2008) 'Accounting for detectability in reef-fish biodiversity  
767 estimates', *Marine Ecology Progress Series*, 367, pp. 249–260. doi:  
768 10.3354/meps07580.
- 769 Marques, V. *et al.* (2020) 'Blind assessment of vertebrate taxonomic diversity across  
770 spatial scales by clustering environmental DNA metabarcoding sequences',  
771 *Ecography*, 43(12), pp. 1779–1790. doi: 10.1111/ecog.05049.
- 772 Marques, V. *et al.* (2021) 'GAPeDNA: Assessing and mapping global species gaps in  
773 genetic databases for eDNA metabarcoding', *Diversity and Distributions*, (April), pp.  
774 1–13. doi: 10.1111/ddi.13142.
- 775 Martin, M. (2011) 'Cutadapt removes adapter sequences from high-throughput  
776 sequencing reads', *EMBnet.journal*, 17(1), p. 10. doi: 10.14806/ej.17.1.200.

- 777 Matthews, T. J. *et al.* (2019) 'sars: an R package for fitting, evaluating and comparing  
778 species–area relationship models', *Ecography*, 42, pp. 1446–1455.
- 779 McGill, B. J. *et al.* (2007) 'Species abundance distributions: Moving beyond single  
780 prediction theories to integration within an ecological framework', *Ecology Letters*,  
781 10(10), pp. 995–1015. doi: 10.1111/j.1461-0248.2007.01094.x.
- 782 Menegotto, A. and Rangel, T. F. (2018) 'Mapping knowledge gaps in marine diversity  
783 reveals a latitudinal gradient of missing species richness', *Nature Communications*.  
784 Springer US, 9(1). doi: 10.1038/s41467-018-07217-7.
- 785 Miya, M. *et al.* (2015) 'MiFish, a set of universal PCR primers for metabarcoding  
786 environmental DNA from fishes: Detection of more than 230 subtropical marine  
787 species', *Royal Society Open Science*, 2(7). doi: 10.1098/rsos.150088.
- 788 Moyer, G. R. *et al.* (2014) 'Assessing Environmental DNA Detection in Controlled  
789 Lentic Systems', *PLoS ONE*. Edited by B. Gratwicke, 9(7), p. e103767. doi:  
790 10.1371/journal.pone.0103767.
- 791 Nguyen, B. N. *et al.* (2020) 'Environmental DNA survey captures patterns of fish and  
792 invertebrate diversity across a tropical seascape', *Scientific Reports*, 10(1), pp. 1–14.  
793 doi: 10.1038/s41598-020-63565-9.
- 794 O'Donnell, J. L. *et al.* (2017) 'Spatial distribution of environmental DNA in a  
795 nearshore marine habitat', *PeerJ*, 5(2), p. e3044. doi: 10.7717/peerj.3044.
- 796 Oksanen, J. *et al.* (2019) 'vegan: Community Ecology Package'.
- 797 Pilliod, D. S. *et al.* (2014) 'Factors influencing detection of eDNA from a stream-  
798 dwelling amphibian', *Molecular Ecology Resources*, 14(1), pp. 109–116. doi:  
799 10.1111/1755-0998.12159.
- 800 Polanco Fernández, A. *et al.* (2020) 'Comparing environmental DNA metabarcoding  
801 and underwater visual census to monitor tropical reef fishes', *Environmental DNA*,  
802 (September), pp. 1–15. doi: 10.1002/edn3.140.
- 803 Port, J. A. *et al.* (2016) 'Assessing vertebrate biodiversity in a kelp forest ecosystem  
804 using environmental DNA', *Molecular Ecology*, 25(2), pp. 527–541. doi:  
805 10.1111/mec.13481.
- 806 Rees, H. C. *et al.* (2014) 'The detection of aquatic animal species using  
807 environmental DNA - a review of eDNA as a survey tool in ecology', *Journal of*  
808 *Applied Ecology*. Edited by E. Crispo, 51(5), pp. 1450–1459. doi: 10.1111/1365-  
809 2664.12306.
- 810 Robertson, D. R. and Allen, G. R. (2015) 'Peces Costeros del Pacífico Oriental  
811 Tropical: sistema de Información en línea. Versión 2.0', *Instituto Smithsonian de*  
812 *Investigaciones Tropicales, Balboa, República de Panamá*.
- 813 Robertson, D. R. and Van Tassell, J. (2019) *Shorefishes of the Greater Caribbean:*  
814 *online information system. Version 2.0, Smithsonian Tropical Research Institute,*  
815 *Balboa, Panamá*.
- 816 Rognes, T. *et al.* (2016) 'VSEARCH: A versatile open source tool for metagenomics',  
817 *PeerJ*, 2016(10), pp. 1–22. doi: 10.7717/peerj.2584.
- 818 Rourke, M. L. *et al.* (2021) 'Environmental DNA (eDNA) as a tool for assessing fish

- 819 biomass: A review of approaches and future considerations for resource surveys',  
820 *Environmental DNA*, (July 2020), pp. 1–25. doi: 10.1002/edn3.185.
- 821 Santini, L. *et al.* (2017) 'Assessing the suitability of diversity metrics to detect  
822 biodiversity change', *Biological Conservation*, 213, pp. 341–350. doi:  
823 10.1016/j.biocon.2016.08.024.
- 824 Schenekar, T. *et al.* (2020) 'Reference databases, primer choice, and assay  
825 sensitivity for environmental metabarcoding: Lessons learnt from a re-evaluation of  
826 an eDNA fish assessment in the Volga headwaters', *River Research and  
827 Applications*, 36(7), pp. 1004–1013. doi: 10.1002/rra.3610.
- 828 SIBM (2021) *SIBM: Instituto de Investigaciones Marinas y Costeras - INVEMAR.*  
829 *Sistema de Información sobre Biodiversidad Marina de Colombia - SIBM.* Available  
830 at: [www.invemar.org.co/siam/sibm](http://www.invemar.org.co/siam/sibm). (Accessed: 21 April 2021).
- 831 Sigsgaard, E. E. *et al.* (2019) 'Using vertebrate environmental DNA from seawater in  
832 biomonitoring of marine habitats', *Conservation Biology*, 0(0), pp. 1–14. doi:  
833 10.1111/cobi.13437.
- 834 Smart, A. S. *et al.* (2016) 'Assessing the cost-efficiency of environmental DNA  
835 sampling', *Methods in Ecology and Evolution*. Edited by N. Yoccoz, 7(11), pp. 1291–  
836 1298. doi: 10.1111/2041-210X.12598.
- 837 Stat, M. *et al.* (2017) 'Ecosystem biomonitoring with eDNA: Metabarcoding across the  
838 tree of life in a tropical marine environment', *Scientific Reports*. Springer US, 7(1), pp.  
839 1–11. doi: 10.1038/s41598-017-12501-5.
- 840 Stat, M. *et al.* (2019) 'Combined use of eDNA metabarcoding and video surveillance  
841 for the assessment of fish biodiversity', *Conservation Biology*, 33(1), pp. 196–205.  
842 doi: 10.1111/cobi.13183.
- 843 Strickler, K. M., Fremier, A. K. and Goldberg, C. S. (2015) 'Quantifying effects of UV-  
844 B, temperature, and pH on eDNA degradation in aquatic microcosms', *Biological  
845 Conservation*. Elsevier Ltd, 183, pp. 85–92. doi: 10.1016/j.biocon.2014.11.038.
- 846 Thalinger, B. *et al.* (2021) 'The Effect of Activity, Energy Use, and Species Identity on  
847 Environmental DNA Shedding of Freshwater Fish', *Frontiers in Ecology and  
848 Evolution*, 9(February), pp. 1–13. doi: 10.3389/fevo.2021.623718.
- 849 Thomsen, P. F. *et al.* (2012) 'Detection of a Diverse Marine Fish Fauna Using  
850 Environmental DNA from Seawater Samples', *PLoS ONE*, 7(8), pp. 1–9. doi:  
851 10.1371/journal.pone.0041732.
- 852 Valentini, A. *et al.* (2016) 'Next-generation monitoring of aquatic biodiversity using  
853 environmental DNA metabarcoding', *Molecular Ecology*, 25(4), pp. 929–942. doi:  
854 10.1111/mec.13428.
- 855 Webb, T. J., Vanden Berghe, E. and O'Dor, R. (2010) 'Biodiversity's big wet secret:  
856 the global distribution of marine biological records reveals chronic under-exploration  
857 of the deep pelagic ocean.', *PLoS one*, 5(8), p. e10223. doi:  
858 10.1371/journal.pone.0010223.
- 859 West, K. M. *et al.* (2020) 'eDNA metabarcoding survey reveals fine-scale coral reef  
860 community variation across a remote, tropical island ecosystem', *Molecular Ecology*,  
861 29(6), pp. 1069–1086. doi: 10.1111/mec.15382.

862 Whitney, J. L. *et al.* (2021) 'Surface slicks are pelagic nurseries for diverse ocean  
863 fauna', *Scientific Reports*. Nature Publishing Group UK, 11(1), p. 3197. doi:  
864 10.1038/s41598-021-81407-0.

865 Yamamoto, S. *et al.* (2017) 'Environmental DNA metabarcoding reveals local fish  
866 communities in a species-rich coastal sea', *Scientific Reports*, 7(January), pp. 1–12.  
867 doi: 10.1038/srep40368.

868
